# Supplementary material for: Desacetyl-α-melanocyte stimulating hormone and α-melanocyte stimulating hormone are required to regulate energy balance
Source: PubMed Central journal article supplement (PMC5869732; doi:10.1016/j.molmet.2017.11.008), 2017-11-24

# Figure S1

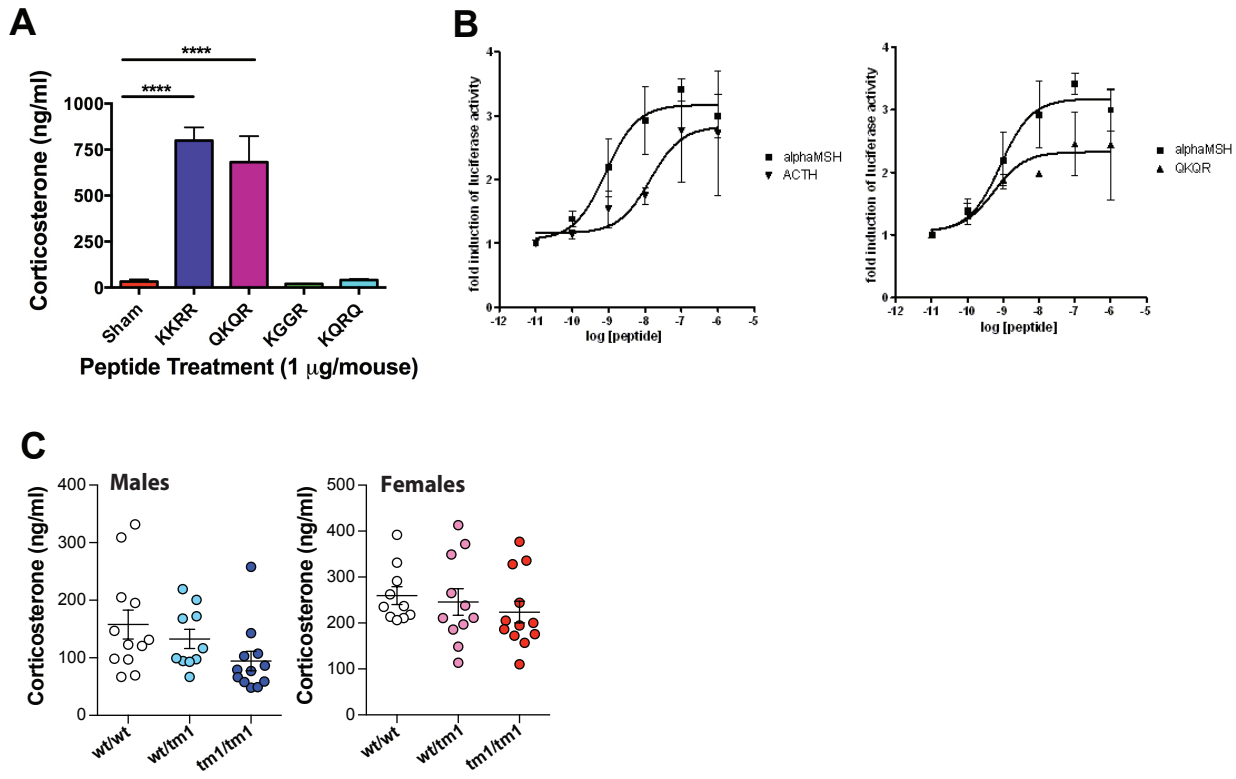

Supplement: mmc1.pdf [file mmc1.pdf]
